# Supplementary material for: Directional Submicrofiber Hydrogel Composite Scaffolds Supporting Neuron Differentiation and Enabling Neurite Alignment
Source: MDPI journal article supplement (doi:10.3390/ijms231911525), 2022-09-29

# Single channels of confocal images for random and aligned scaffolds at day 1 and 14

ALIGNED

Day 1

Composite

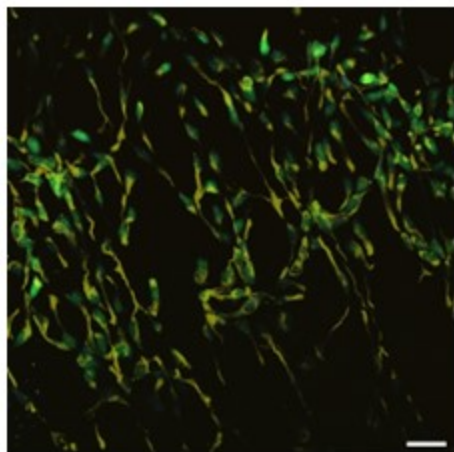

Dapi

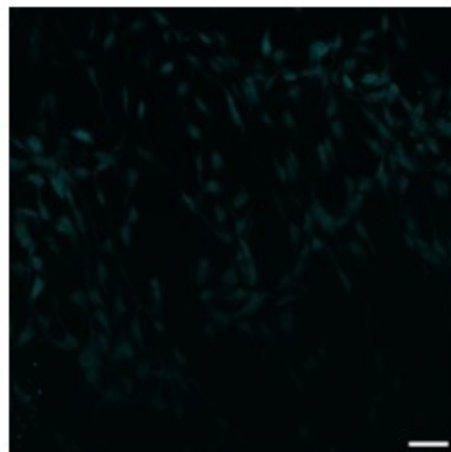

Tubulin

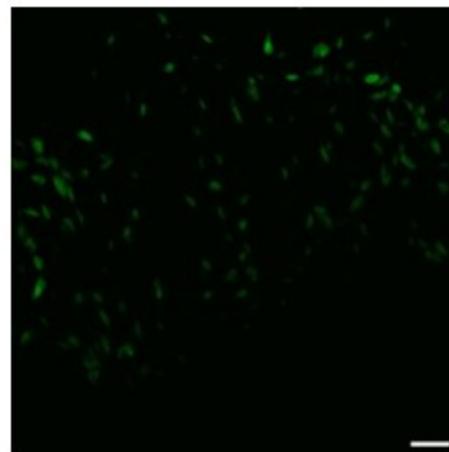

ChAT

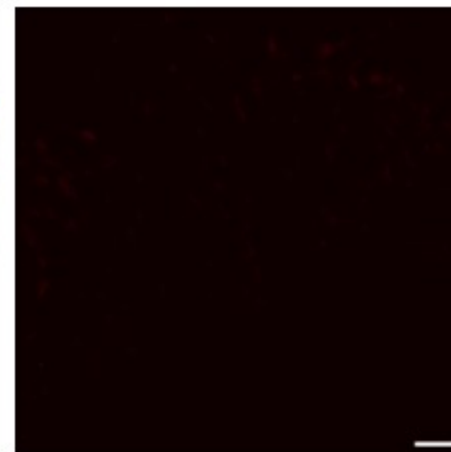

Nestin

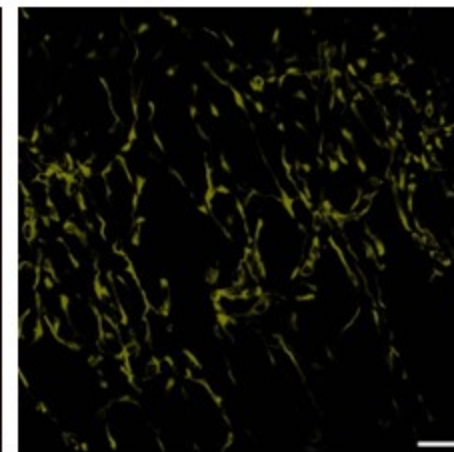

Day 14

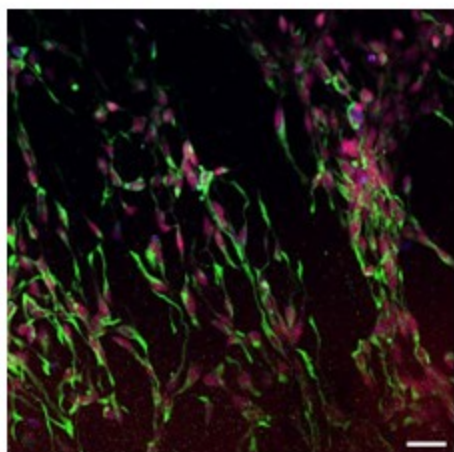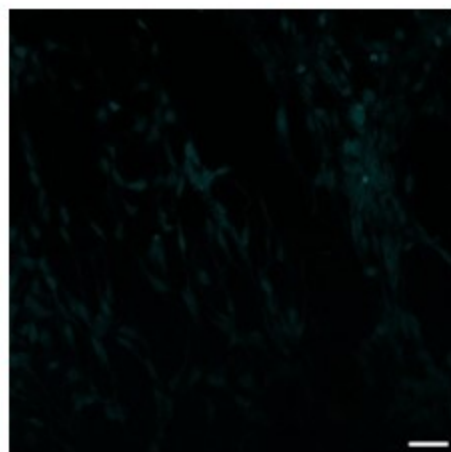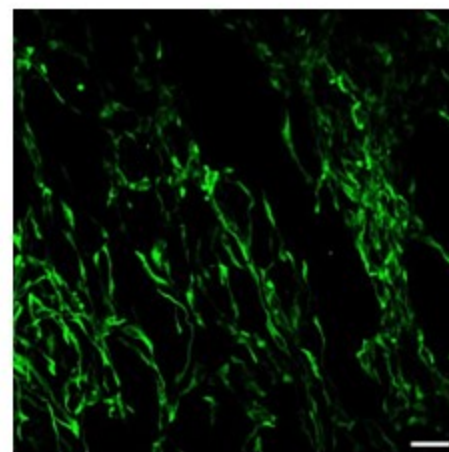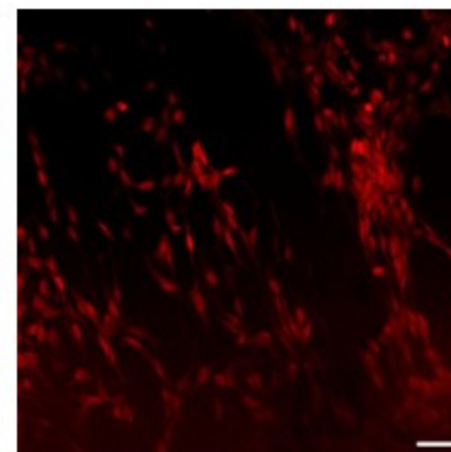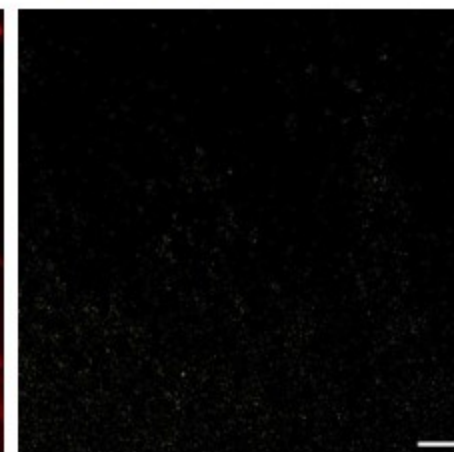

Supplement: s1 [file s1]
