# Supplementary figures and images for: Directional Submicrofiber Hydrogel Composite Scaffolds Supporting Neuron Differentiation and Enabling Neurite Alignment
Source: MDPI journal article supplement (doi:10.3390/ijms231911525), 2022-09-29

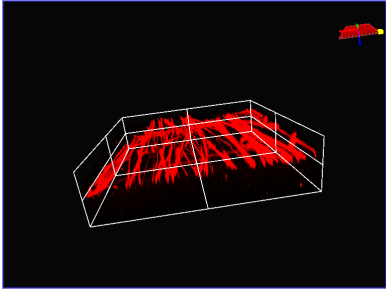

Supplement: s1 [file s1]
